# Supplementary material
Source: publisher figshare collection journal article supplement (https://acs.figshare.com/ndownloader/files/4658704)
Supplement: Supplementary file 1 [file 4658704]

 
data_[FeTPfP1MeImNO]-triclinic (ns33h_224 
 
_audit_creation_method            SHELXL-97 
_chemical_name_systematic 
; 
 ? 
; 
_chemical_name_common             '[Fe(TPFP)(NO)(1-MeIm)]' 
_chemical_melting_point           ? 
_chemical_formula_moiety          'C48 H30 F4 Fe N7 O'  
_chemical_formula_sum             'C48 H30 F4 Fe N7 O' 
_chemical_formula_weight          852.64  
 
loop_ 
 _atom_type_symbol 
 _atom_type_description 
 _atom_type_scat_dispersion_real 
 _atom_type_scat_dispersion_imag 
 _atom_type_scat_source 
 'C'  'C'    .0033    .0016 
 'International Tables Vol C Tables 4.2.6.8 and 6.1.1.4' 
 'H'  'H'    .0000    .0000 
 'International Tables Vol C Tables 4.2.6.8 and 6.1.1.4' 
 'N'  'N'    .0061    .0033 
 'International Tables Vol C Tables 4.2.6.8 and 6.1.1.4' 
 'O'  'O'    .0106    .0060 
 'International Tables Vol C Tables 4.2.6.8 and 6.1.1.4' 
 'F'  'F'    .0171    .0103 
 'International Tables Vol C Tables 4.2.6.8 and 6.1.1.4' 
 'Fe'  'Fe'    .3463    .8444 
 'International Tables Vol C Tables 4.2.6.8 and 6.1.1.4' 
 
_symmetry_cell_setting           triclinic
_symmetry_space_group_name_H-M   'P -1'
_symmetry_int_tables_number      2
_symmetry_space_group_name_Hall  '-P 1' 
 
loop_ 
 _symmetry_equiv_pos_as_xyz 
 'x, y, z' 
 '-x, -y, -z' 
 
_cell_length_a                    11.5768(2) 
_cell_length_b                    12.3122(2) 
_cell_length_c                    14.2588(2) 
_cell_angle_alpha                 92.9470(10) 
_cell_angle_beta                  102.0200(10) 
_cell_angle_gamma                 100.4300(10) 
_cell_volume                      1946.58(5) 
_cell_formula_units_Z             2 
_cell_measurement_temperature     224(2) 
_cell_measurement_reflns_used     8925 
_cell_measurement_theta_min       2.7270 
_cell_measurement_theta_max       31.2687 
 
_exptl_crystal_description        'multifaceted diamond' 
_exptl_crystal_colour             purple 
_exptl_crystal_size_max           0.42 
_exptl_crystal_size_mid           0.16 
_exptl_crystal_size_min           0.16 
_exptl_crystal_density_meas       ? 
_exptl_crystal_density_diffrn     1.455 
_exptl_crystal_density_method     'not measured' 
_exptl_crystal_F_000              874 
_exptl_absorpt_coefficient_mu     0.456 
_exptl_absorpt_correction_type    multiscan 
_exptl_absorpt_correction_T_min   0.8327 
_exptl_absorpt_correction_T_max   0.9311 
_exptl_absorpt_process_details    'Blessing, R.H. ACTA Cryst. (1995) A51, 33-38'
_exptl_crystal_recrystallization_method 
'vapor diffusion (chloroform/isopropanol)'

 
_exptl_special_details 
; 
 ? 
; 
 
_diffrn_ambient_temperature       224(2) 
_diffrn_radiation_wavelength      0.71073 
_diffrn_radiation_type            MoK\a 
_diffrn_radiation_source          'fine-focus sealed tube' 
_diffrn_radiation_monochromator   graphite 
_diffrn_measurement_device_type   'Bruker D8 Apex II CCD Diffractometer'
_diffrn_measurement_method       '\w and \f scans'
_diffrn_detector_area_resol_mean  8.33
_diffrn_standards_number          ? 
_diffrn_standards_interval_count  ? 
_diffrn_standards_interval_time   ? 
_diffrn_standards_decay_%         ? 
_diffrn_reflns_number             66060 
_diffrn_reflns_av_R_equivalents   0.0350 
_diffrn_reflns_av_sigmaI/netI     0.0245 
_diffrn_reflns_limit_h_min        -16 
_diffrn_reflns_limit_h_max        16 
_diffrn_reflns_limit_k_min        -17 
_diffrn_reflns_limit_k_max        17 
_diffrn_reflns_limit_l_min        -20 
_diffrn_reflns_limit_l_max        20 
_diffrn_reflns_theta_min          1.69 
_diffrn_reflns_theta_max          31.00 
_reflns_number_total              12320 
_reflns_number_gt                 9903 
_reflns_threshold_expression      >2sigma(I) 
 
_computing_data_collection       'APEX2 (Bruker, 2004)'
_computing_cell_refinement       'APEX2/SAINT (Bruker, 2004)'
_computing_data_reduction        'SAINT/XPREP (Bruker, 2004; Sheldrick, 2001)'
_computing_structure_solution    'SHELXS-97 (Sheldrick, 1990)'
_computing_structure_refinement  'SHELXL-97 (Sheldrick, 1997)'
_computing_molecular_graphics    'Platon (Spek, 2004)'
_computing_publication_material  'XCIF (Sheldrick, 2001)' 
 
 
_refine_special_details 
; 
 Refinement of F^2^ against ALL reflections.  The weighted R-factor wR and 
 goodness of fit S are based on F^2^, conventional R-factors R are based 
 on F, with F set to zero for negative F^2^. The threshold expression of 
 F^2^ > 2sigma(F^2^) is used only for calculating R-factors(gt) etc. and is 
 not relevant to the choice of reflections for refinement.  R-factors based 
 on F^2^ are statistically about twice as large as those based on F, and R- 
 factors based on ALL data will be even larger. 
 
 The structure was solved by direct methods using SHELXS-97 and refined 
 against F^2^ using SHELXL-97;subsequent difference Fourier syntheses led to 
 the location of the remaining non-hydrogen atoms. For the structure 
 refinement all data were used including negative intensities. All 
 non-hydrogen atoms were refined anisotropically. Hydrogen atoms were 
 idealized with the standard SHELXL-97 idealization methods.  Hydrogen atoms 
 were placed at calculated geometries and allowed to ride on the position of
 the parent atom. Hydrogen thermal parameters were set to 1.2\\times the 
 equivalent isotropic U of the parent atom, 1.5\\times for methyl hydrogens. 
 The program SADABS was applied for the absorption correction. Data is 99.2 
 percent complete to 0.78 angstroms.
 
 The structure is a iron parafluorotetraphenylporphyrin bound axially nitric
 oxide and 1-methylimidazole.
;  
 
_refine_ls_structure_factor_coef  Fsqd  
_refine_ls_matrix_type            full 
_refine_ls_weighting_scheme       calc  
_refine_ls_weighting_details 
 'calc w=1/[\s^2^(Fo^2^)+(0.0557P)^2^+0.6470P] where P=(Fo^2^+2Fc^2^)/3' 
_atom_sites_solution_primary      direct 
_atom_sites_solution_secondary    difmap 
_atom_sites_solution_hydrogens    geom 
_refine_ls_hydrogen_treatment     constr 
_refine_ls_extinction_method      none 
_refine_ls_extinction_coef        ? 
_refine_ls_number_reflns          12320 
_refine_ls_number_parameters      555 
_refine_ls_number_restraints      0 
_refine_ls_R_factor_all           0.0525 
_refine_ls_R_factor_gt            0.0392 
_refine_ls_wR_factor_ref          0.1118 
_refine_ls_wR_factor_gt           0.1025 
_refine_ls_goodness_of_fit_ref    1.022 
_refine_ls_restrained_S_all       1.022 
_refine_ls_shift/su_max           0.001 
_refine_ls_shift/su_mean          0.000 
 
loop_ 
 _atom_site_label 
 _atom_site_type_symbol 
 _atom_site_fract_x 
 _atom_site_fract_y 
 _atom_site_fract_z 
 _atom_site_U_iso_or_equiv 
 _atom_site_adp_type 
 _atom_site_occupancy 
 _atom_site_symmetry_multiplicity 
 _atom_site_calc_flag 
 _atom_site_refinement_flags 
 _atom_site_disorder_assembly 
 _atom_site_disorder_group 
Fe1 Fe 0.378200(16) 0.120024(14) 0.251063(12) 0.02412(6) Uani 1 1 d . A . 
N1 N 0.40997(10) 0.15745(9) 0.12257(8) 0.0267(2) Uani 1 1 d . . . 
N2 N 0.24133(10) -0.00227(9) 0.18633(8) 0.0270(2) Uani 1 1 d . . . 
N3 N 0.33697(10) 0.09111(9) 0.37920(8) 0.0277(2) Uani 1 1 d . . . 
N4 N 0.50810(10) 0.24942(9) 0.31547(8) 0.0267(2) Uani 1 1 d . . . 
C(M1 C 0.25815(12) 0.01036(11) 0.01731(9) 0.0277(2) Uani 1 1 d . . . 
C(M2 C 0.17179(12) -0.07140(11) 0.32880(10) 0.0305(3) Uani 1 1 d . . . 
C(M3 C 0.48872(13) 0.23829(11) 0.48409(9) 0.0293(3) Uani 1 1 d . . . 
C(M4 C 0.57907(12) 0.31711(11) 0.17380(10) 0.0291(3) Uani 1 1 d . . . 
C(A1 C 0.49342(12) 0.24435(11) 0.10465(9) 0.0288(3) Uani 1 1 d . . . 
C(A2 C 0.34934(12) 0.10532(11) 0.03380(9) 0.0285(3) Uani 1 1 d . . . 
C(A3 C 0.21194(12) -0.04074(11) 0.09040(9) 0.0275(2) Uani 1 1 d . . . 
C(A4 C 0.17305(12) -0.07746(11) 0.23101(10) 0.0292(3) Uani 1 1 d . . . 
C(A5 C 0.24760(13) 0.00960(11) 0.39684(10) 0.0310(3) Uani 1 1 d . . . 
C(A6 C 0.39167(13) 0.14865(11) 0.46714(9) 0.0303(3) Uani 1 1 d . . . 
C(A7 C 0.54394(12) 0.28204(11) 0.41243(9) 0.0282(2) Uani 1 1 d . . . 
C(A8 C 0.58602(12) 0.31651(11) 0.27253(10) 0.0281(2) Uani 1 1 d . . . 
C(B1 C 0.48156(14) 0.24872(13) 0.00249(10) 0.0367(3) Uani 1 1 d . . . 
H(B1 H 0.5268 0.3012 -0.0281 0.044 Uiso 1 1 calc R . . 
C(B2 C 0.39286(14) 0.16281(12) -0.04117(10) 0.0357(3) Uani 1 1 d . . . 
H(B2 H 0.3650 0.1442 -0.1079 0.043 Uiso 1 1 calc R . . 
C(B3 C 0.12452(13) -0.14329(11) 0.07530(10) 0.0332(3) Uani 1 1 d . . . 
H(B3 H 0.0907 -0.1864 0.0164 0.040 Uiso 1 1 calc R . . 
C(B4 C 0.10054(14) -0.16558(12) 0.16173(11) 0.0349(3) Uani 1 1 d . . . 
H(B4 H 0.0467 -0.2270 0.1743 0.042 Uiso 1 1 calc R . . 
C(B5 C 0.24447(16) 0.01864(14) 0.49757(11) 0.0420(4) Uani 1 1 d . . . 
H(B5 H 0.1908 -0.0263 0.5274 0.050 Uiso 1 1 calc R . . 
C(B6 C 0.33337(15) 0.10406(14) 0.54071(11) 0.0410(3) Uani 1 1 d . . . 
H(B6 H 0.3535 0.1297 0.6064 0.049 Uiso 1 1 calc R . . 
C(B7 C 0.64893(13) 0.36988(12) 0.43049(10) 0.0342(3) Uani 1 1 d . . . 
H(B7 H 0.6910 0.4062 0.4908 0.041 Uiso 1 1 calc R . . 
C(B8 C 0.67556(13) 0.39022(12) 0.34440(10) 0.0348(3) Uani 1 1 d . . . 
H(B8 H 0.7402 0.4426 0.3335 0.042 Uiso 1 1 calc R . . 
F10 F 0.06511(12) -0.17116(11) -0.36375(8) 0.0669(3) Uani 1 1 d . . . 
C11 C 0.20678(12) -0.03813(11) -0.08420(9) 0.0278(2) Uani 1 1 d . . . 
C12 C 0.28044(13) -0.07284(12) -0.14080(10) 0.0326(3) Uani 1 1 d . . . 
H12 H 0.3632 -0.0661 -0.1145 0.039 Uiso 1 1 calc R . . 
C13 C 0.23340(15) -0.11713(13) -0.23540(11) 0.0389(3) Uani 1 1 d . . . 
H13 H 0.2833 -0.1394 -0.2738 0.047 Uiso 1 1 calc R . . 
C14 C 0.11208(16) -0.12758(13) -0.27132(11) 0.0407(3) Uani 1 1 d . . . 
C15 C 0.03611(14) -0.09510(14) -0.21811(11) 0.0408(3) Uani 1 1 d . . . 
H15 H -0.0468 -0.1037 -0.2447 0.049 Uiso 1 1 calc R . . 
C16 C 0.08437(13) -0.04955(13) -0.12459(11) 0.0347(3) Uani 1 1 d . . . 
H16 H 0.0337 -0.0258 -0.0875 0.042 Uiso 1 1 calc R . . 
F20 F -0.15165(14) -0.39846(12) 0.45381(10) 0.0861(5) Uani 1 1 d . . . 
C21 C 0.08534(14) -0.15878(12) 0.36230(10) 0.0350(3) Uani 1 1 d . . . 
C22 C 0.12743(17) -0.23465(14) 0.42240(12) 0.0443(4) Uani 1 1 d . . . 
H22 H 0.2108 -0.2305 0.4429 0.053 Uiso 1 1 calc R . . 
C23 C 0.0477(2) -0.31716(15) 0.45286(13) 0.0527(5) Uani 1 1 d . . . 
H23 H 0.0761 -0.3693 0.4930 0.063 Uiso 1 1 calc R . . 
C24 C -0.07242(19) -0.31993(16) 0.42281(13) 0.0554(5) Uani 1 1 d . . . 
C25 C -0.11840(19) -0.2475(2) 0.36310(16) 0.0623(6) Uani 1 1 d . . . 
H25 H -0.2020 -0.2527 0.3432 0.075 Uiso 1 1 calc R . . 
C26 C -0.03834(17) -0.16597(17) 0.33243(15) 0.0524(4) Uani 1 1 d . . . 
H26 H -0.0681 -0.1153 0.2912 0.063 Uiso 1 1 calc R . . 
F30 F 0.65425(14) 0.43598(11) 0.86337(8) 0.0709(4) Uani 1 1 d . . . 
C31 C 0.53547(13) 0.29144(11) 0.58532(10) 0.0300(3) Uani 1 1 d . . . 
C32 C 0.52101(16) 0.39856(13) 0.60906(11) 0.0397(3) Uani 1 1 d . . . 
H32 H 0.4821 0.4375 0.5611 0.048 Uiso 1 1 calc R . . 
C33 C 0.56313(18) 0.44880(14) 0.70234(12) 0.0463(4) Uani 1 1 d . . . 
H33 H 0.5549 0.5217 0.7179 0.056 Uiso 1 1 calc R . . 
C34 C 0.61680(16) 0.38940(15) 0.77084(11) 0.0443(4) Uani 1 1 d . . . 
C35 C 0.63327(16) 0.28392(15) 0.75107(11) 0.0429(4) Uani 1 1 d . . . 
H35 H 0.6714 0.2455 0.7998 0.051 Uiso 1 1 calc R . . 
C36 C 0.59226(14) 0.23531(13) 0.65719(11) 0.0362(3) Uani 1 1 d . . . 
H36 H 0.6032 0.1632 0.6422 0.043 Uiso 1 1 calc R . . 
F40 F 0.92550(12) 0.62109(11) 0.04895(9) 0.0718(4) Uani 1 1 d . . . 
C41 C 0.67033(13) 0.39917(12) 0.13973(10) 0.0322(3) Uani 1 1 d . . . 
C42 C 0.6734(2) 0.51165(14) 0.15077(15) 0.0547(5) Uani 1 1 d . . . 
H42 H 0.6166 0.5380 0.1797 0.066 Uiso 1 1 calc R . . 
C43 C 0.7598(2) 0.58686(16) 0.11963(17) 0.0644(6) Uani 1 1 d . . . 
H43 H 0.7616 0.6635 0.1271 0.077 Uiso 1 1 calc R . . 
C44 C 0.84036(16) 0.54743(15) 0.07864(11) 0.0479(4) Uani 1 1 d . . . 
C45 C 0.84111(16) 0.43680(17) 0.06484(14) 0.0500(4) Uani 1 1 d . . . 
H45 H 0.8979 0.4119 0.0350 0.060 Uiso 1 1 calc R . . 
C46 C 0.75503(15) 0.36241(14) 0.09647(13) 0.0445(4) Uani 1 1 d . . . 
H46 H 0.7541 0.2860 0.0884 0.053 Uiso 1 1 calc R . . 
N5 N 0.47444(11) 0.02519(10) 0.25727(9) 0.0329(2) Uani 1 1 d . . . 
O1 O 0.49108(12) -0.04840(10) 0.20871(10) 0.0491(4) Uani 0.945(3) 1 d P A 1 
O1A O 0.560(2) 0.0274(18) 0.3356(18) 0.0491(4) Uani 0.055(3) 1 d P A 2 
N6 N 0.25697(10) 0.23770(10) 0.23380(8) 0.0303(2) Uani 1 1 d . . . 
N7 N 0.15425(14) 0.36391(12) 0.26508(10) 0.0436(3) Uani 1 1 d . . . 
C1 C 0.22332(15) 0.29310(13) 0.30174(11) 0.0374(3) Uani 1 1 d . A . 
H1A H 0.2451 0.2840 0.3677 0.045 Uiso 1 1 calc R . . 
C2 C 0.14306(18) 0.35384(17) 0.16782(12) 0.0500(4) Uani 1 1 d . A . 
H2A H 0.0999 0.3930 0.1226 0.060 Uiso 1 1 calc R . . 
C3 C 0.20634(16) 0.27629(15) 0.14938(11) 0.0432(4) Uani 1 1 d . A . 
H3A H 0.2145 0.2523 0.0879 0.052 Uiso 1 1 calc R . . 
C4 C 0.1022(3) 0.4401(2) 0.31745(17) 0.0787(8) Uani 1 1 d . A . 
H4A H 0.1237 0.4319 0.3858 0.118 Uiso 1 1 calc R . . 
H4B H 0.0152 0.4234 0.2956 0.118 Uiso 1 1 calc R . . 
H4C H 0.1329 0.5157 0.3058 0.118 Uiso 1 1 calc R . . 
 
loop_ 
 _atom_site_aniso_label 
 _atom_site_aniso_U_11 
 _atom_site_aniso_U_22 
 _atom_site_aniso_U_33 
 _atom_site_aniso_U_23 
 _atom_site_aniso_U_13 
 _atom_site_aniso_U_12 
Fe1 0.02486(9) 0.02337(9) 0.02371(9) 0.00184(6) 0.00855(7) 0.00010(6) 
N1 0.0278(5) 0.0257(5) 0.0260(5) 0.0011(4) 0.0095(4) -0.0004(4) 
N2 0.0285(5) 0.0261(5) 0.0259(5) 0.0009(4) 0.0101(4) -0.0007(4) 
N3 0.0286(5) 0.0279(5) 0.0259(5) 0.0026(4) 0.0090(4) 0.0000(4) 
N4 0.0277(5) 0.0266(5) 0.0249(5) 0.0032(4) 0.0075(4) 0.0006(4) 
C(M1 0.0282(6) 0.0277(6) 0.0265(6) -0.0012(5) 0.0094(5) 0.0012(5) 
C(M2 0.0308(6) 0.0294(6) 0.0309(6) 0.0044(5) 0.0119(5) -0.0011(5) 
C(M3 0.0334(6) 0.0287(6) 0.0248(6) 0.0031(5) 0.0066(5) 0.0034(5) 
C(M4 0.0289(6) 0.0273(6) 0.0308(6) 0.0039(5) 0.0111(5) -0.0004(5) 
C(A1 0.0309(6) 0.0279(6) 0.0276(6) 0.0033(5) 0.0114(5) -0.0002(5) 
C(A2 0.0308(6) 0.0283(6) 0.0263(6) 0.0006(5) 0.0111(5) 0.0003(5) 
C(A3 0.0273(6) 0.0263(6) 0.0280(6) -0.0008(5) 0.0091(5) 0.0001(5) 
C(A4 0.0299(6) 0.0264(6) 0.0302(6) 0.0015(5) 0.0103(5) -0.0014(5) 
C(A5 0.0329(6) 0.0317(6) 0.0288(6) 0.0032(5) 0.0129(5) 0.0002(5) 
C(A6 0.0338(6) 0.0316(6) 0.0254(6) 0.0026(5) 0.0105(5) 0.0013(5) 
C(A7 0.0296(6) 0.0273(6) 0.0256(6) 0.0025(5) 0.0049(5) 0.0012(5) 
C(A8 0.0269(6) 0.0261(6) 0.0296(6) 0.0025(5) 0.0077(5) -0.0006(4) 
C(B1 0.0423(8) 0.0362(7) 0.0290(6) 0.0051(5) 0.0137(6) -0.0060(6) 
C(B2 0.0421(8) 0.0362(7) 0.0261(6) 0.0019(5) 0.0118(6) -0.0044(6) 
C(B3 0.0346(7) 0.0294(6) 0.0316(6) -0.0029(5) 0.0090(5) -0.0048(5) 
C(B4 0.0367(7) 0.0299(6) 0.0340(7) 0.0014(5) 0.0107(6) -0.0068(5) 
C(B5 0.0474(9) 0.0449(8) 0.0313(7) 0.0006(6) 0.0191(6) -0.0086(7) 
C(B6 0.0476(9) 0.0448(8) 0.0276(6) -0.0005(6) 0.0161(6) -0.0067(7) 
C(B7 0.0342(7) 0.0331(7) 0.0292(6) 0.0016(5) 0.0032(5) -0.0045(5) 
C(B8 0.0332(7) 0.0333(7) 0.0319(7) 0.0018(5) 0.0058(5) -0.0065(5) 
F10 0.0722(8) 0.0834(9) 0.0322(5) -0.0176(5) 0.0029(5) -0.0014(7) 
C11 0.0300(6) 0.0259(6) 0.0266(6) 0.0007(4) 0.0087(5) 0.0007(5) 
C12 0.0309(6) 0.0356(7) 0.0316(6) -0.0004(5) 0.0100(5) 0.0051(5) 
C13 0.0450(8) 0.0405(8) 0.0331(7) -0.0039(6) 0.0160(6) 0.0072(6) 
C14 0.0491(9) 0.0401(8) 0.0272(7) -0.0035(6) 0.0059(6) -0.0010(7) 
C15 0.0326(7) 0.0479(9) 0.0367(8) -0.0001(6) 0.0030(6) 0.0013(6) 
C16 0.0306(6) 0.0397(7) 0.0345(7) -0.0001(6) 0.0104(5) 0.0056(5) 
F20 0.0961(10) 0.0800(9) 0.0596(7) 0.0040(6) 0.0287(7) -0.0538(8) 
C21 0.0385(7) 0.0332(7) 0.0315(7) 0.0004(5) 0.0154(6) -0.0058(5) 
C22 0.0518(9) 0.0408(8) 0.0406(8) 0.0078(6) 0.0193(7) -0.0020(7) 
C23 0.0749(13) 0.0393(8) 0.0419(9) 0.0077(7) 0.0227(9) -0.0068(8) 
C24 0.0702(12) 0.0480(9) 0.0369(8) -0.0038(7) 0.0240(8) -0.0287(9) 
C25 0.0441(10) 0.0748(14) 0.0604(12) 0.0039(10) 0.0196(9) -0.0170(9) 
C26 0.0415(9) 0.0560(10) 0.0585(11) 0.0133(8) 0.0179(8) -0.0040(8) 
F30 0.0976(10) 0.0690(8) 0.0312(5) -0.0106(5) 0.0029(6) -0.0048(7) 
C31 0.0331(6) 0.0300(6) 0.0257(6) 0.0028(5) 0.0078(5) 0.0017(5) 
C32 0.0537(9) 0.0346(7) 0.0318(7) 0.0047(6) 0.0084(6) 0.0123(6) 
C33 0.0654(11) 0.0354(8) 0.0381(8) -0.0026(6) 0.0146(8) 0.0082(7) 
C34 0.0512(9) 0.0487(9) 0.0260(7) -0.0036(6) 0.0060(6) -0.0036(7) 
C35 0.0468(9) 0.0477(9) 0.0300(7) 0.0081(6) 0.0009(6) 0.0055(7) 
C36 0.0423(8) 0.0339(7) 0.0319(7) 0.0047(5) 0.0071(6) 0.0069(6) 
F40 0.0756(8) 0.0723(8) 0.0501(6) 0.0040(5) 0.0239(6) -0.0416(7) 
C41 0.0323(6) 0.0323(6) 0.0288(6) 0.0042(5) 0.0086(5) -0.0046(5) 
C42 0.0685(12) 0.0352(8) 0.0682(12) 0.0075(8) 0.0399(10) 0.0012(8) 
C43 0.0899(16) 0.0334(8) 0.0722(13) 0.0054(8) 0.0414(12) -0.0095(9) 
C44 0.0480(9) 0.0532(10) 0.0303(7) 0.0049(6) 0.0094(6) -0.0231(7) 
C45 0.0379(8) 0.0625(11) 0.0509(10) 0.0135(8) 0.0197(7) -0.0006(7) 
C46 0.0429(8) 0.0408(8) 0.0536(10) 0.0113(7) 0.0225(7) 0.0025(7) 
N5 0.0322(6) 0.0314(6) 0.0376(6) 0.0080(5) 0.0134(5) 0.0044(4) 
O1 0.0541(8) 0.0380(6) 0.0636(9) 0.0023(6) 0.0279(7) 0.0146(6) 
O1A 0.0541(8) 0.0380(6) 0.0636(9) 0.0023(6) 0.0279(7) 0.0146(6) 
N6 0.0297(5) 0.0323(5) 0.0283(5) 0.0015(4) 0.0076(4) 0.0032(4) 
N7 0.0518(8) 0.0487(8) 0.0353(6) 0.0005(6) 0.0101(6) 0.0232(6) 
C1 0.0434(8) 0.0407(8) 0.0281(6) -0.0002(5) 0.0059(6) 0.0115(6) 
C2 0.0596(11) 0.0644(11) 0.0350(8) 0.0109(7) 0.0112(7) 0.0325(9) 
C3 0.0495(9) 0.0566(10) 0.0290(7) 0.0065(6) 0.0105(6) 0.0216(8) 
C4 0.112(2) 0.0912(17) 0.0520(12) -0.0013(11) 0.0224(12) 0.0682(16) 
 
_geom_special_details 
; 
 All esds (except the esd in the dihedral angle between two l.s. planes) 
 are estimated using the full covariance matrix.  The cell esds are taken 
 into account individually in the estimation of esds in distances, angles 
 and torsion angles; correlations between esds in cell parameters are only 
 used when they are defined by crystal symmetry.  An approximate (isotropic) 
 treatment of cell esds is used for estimating esds involving l.s. planes. 
; 
 
loop_ 
 _geom_bond_atom_site_label_1 
 _geom_bond_atom_site_label_2 
 _geom_bond_distance 
 _geom_bond_site_symmetry_2 
 _geom_bond_publ_flag 
Fe1 N5 1.7473(12) . ? 
Fe1 N1 2.0026(11) . ? 
Fe1 N2 2.0035(11) . ? 
Fe1 N4 2.0124(11) . ? 
Fe1 N3 2.0153(11) . ? 
Fe1 N6 2.1814(12) . ? 
N1 C(A2 1.3748(16) . ? 
N1 C(A1 1.3784(16) . ? 
N2 C(A3 1.3757(16) . ? 
N2 C(A4 1.3759(16) . ? 
N3 C(A6 1.3750(17) . ? 
N3 C(A5 1.3781(16) . ? 
N4 C(A8 1.3723(16) . ? 
N4 C(A7 1.3743(16) . ? 
C(M1 C(A3 1.3950(18) . ? 
C(M1 C(A2 1.3994(17) . ? 
C(M1 C11 1.4930(17) . ? 
C(M2 C(A5 1.3911(19) . ? 
C(M2 C(A4 1.3958(19) . ? 
C(M2 C21 1.4998(18) . ? 
C(M3 C(A7 1.3952(19) . ? 
C(M3 C(A6 1.3962(19) . ? 
C(M3 C31 1.5014(18) . ? 
C(M4 C(A1 1.3922(18) . ? 
C(M4 C(A8 1.3936(19) . ? 
C(M4 C41 1.5003(18) . ? 
C(A1 C(B1 1.4391(19) . ? 
C(A2 C(B2 1.4389(19) . ? 
C(A3 C(B3 1.4434(17) . ? 
C(A4 C(B4 1.4394(18) . ? 
C(A5 C(B5 1.4434(19) . ? 
C(A6 C(B6 1.4413(19) . ? 
C(A7 C(B7 1.4416(18) . ? 
C(A8 C(B8 1.4386(18) . ? 
C(B1 C(B2 1.354(2) . ? 
C(B1 H(B1 0.9400 . ? 
C(B2 H(B2 0.9400 . ? 
C(B3 C(B4 1.349(2) . ? 
C(B3 H(B3 0.9400 . ? 
C(B4 H(B4 0.9400 . ? 
C(B5 C(B6 1.350(2) . ? 
C(B5 H(B5 0.9400 . ? 
C(B6 H(B6 0.9400 . ? 
C(B7 C(B8 1.351(2) . ? 
C(B7 H(B7 0.9400 . ? 
C(B8 H(B8 0.9400 . ? 
F10 C14 1.3578(17) . ? 
C11 C16 1.393(2) . ? 
C11 C12 1.3943(19) . ? 
C12 C13 1.387(2) . ? 
C12 H12 0.9400 . ? 
C13 C14 1.371(2) . ? 
C13 H13 0.9400 . ? 
C14 C15 1.372(2) . ? 
C15 C16 1.380(2) . ? 
C15 H15 0.9400 . ? 
C16 H16 0.9400 . ? 
F20 C24 1.3650(19) . ? 
C21 C22 1.385(2) . ? 
C21 C26 1.391(2) . ? 
C22 C23 1.395(2) . ? 
C22 H22 0.9400 . ? 
C23 C24 1.361(3) . ? 
C23 H23 0.9400 . ? 
C24 C25 1.365(3) . ? 
C25 C26 1.391(3) . ? 
C25 H25 0.9400 . ? 
C26 H26 0.9400 . ? 
F30 C34 1.3608(18) . ? 
C31 C36 1.384(2) . ? 
C31 C32 1.393(2) . ? 
C32 C33 1.388(2) . ? 
C32 H32 0.9400 . ? 
C33 C34 1.364(3) . ? 
C33 H33 0.9400 . ? 
C34 C35 1.370(3) . ? 
C35 C36 1.388(2) . ? 
C35 H35 0.9400 . ? 
C36 H36 0.9400 . ? 
F40 C44 1.3649(17) . ? 
C41 C42 1.379(2) . ? 
C41 C46 1.389(2) . ? 
C42 C43 1.395(2) . ? 
C42 H42 0.9400 . ? 
C43 C44 1.345(3) . ? 
C43 H43 0.9400 . ? 
C44 C45 1.368(3) . ? 
C45 C46 1.391(2) . ? 
C45 H45 0.9400 . ? 
C46 H46 0.9400 . ? 
N5 O1 1.1798(17) . ? 
N5 O1A 1.33(3) . ? 
N6 C1 1.3194(18) . ? 
N6 C3 1.3726(19) . ? 
N7 C1 1.341(2) . ? 
N7 C2 1.363(2) . ? 
N7 C4 1.456(2) . ? 
C1 H1A 0.9400 . ? 
C2 C3 1.351(2) . ? 
C2 H2A 0.9400 . ? 
C3 H3A 0.9400 . ? 
C4 H4A 0.9700 . ? 
C4 H4B 0.9700 . ? 
C4 H4C 0.9700 . ? 
 
loop_ 
 _geom_angle_atom_site_label_1 
 _geom_angle_atom_site_label_2 
 _geom_angle_atom_site_label_3 
 _geom_angle 
 _geom_angle_site_symmetry_1 
 _geom_angle_site_symmetry_3 
 _geom_angle_publ_flag 
N5 Fe1 N1 89.99(5) . . ? 
N5 Fe1 N2 88.78(5) . . ? 
N1 Fe1 N2 90.10(4) . . ? 
N5 Fe1 N4 94.89(5) . . ? 
N1 Fe1 N4 89.93(4) . . ? 
N2 Fe1 N4 176.33(5) . . ? 
N5 Fe1 N3 94.68(5) . . ? 
N1 Fe1 N3 175.33(5) . . ? 
N2 Fe1 N3 89.86(4) . . ? 
N4 Fe1 N3 89.80(4) . . ? 
N5 Fe1 N6 176.50(5) . . ? 
N1 Fe1 N6 86.74(5) . . ? 
N2 Fe1 N6 89.99(4) . . ? 
N4 Fe1 N6 86.35(4) . . ? 
N3 Fe1 N6 88.59(5) . . ? 
C(A2 N1 C(A1 105.76(11) . . ? 
C(A2 N1 Fe1 127.21(9) . . ? 
C(A1 N1 Fe1 126.96(9) . . ? 
C(A3 N2 C(A4 105.89(10) . . ? 
C(A3 N2 Fe1 126.54(9) . . ? 
C(A4 N2 Fe1 126.54(9) . . ? 
C(A6 N3 C(A5 105.63(11) . . ? 
C(A6 N3 Fe1 127.28(9) . . ? 
C(A5 N3 Fe1 127.08(9) . . ? 
C(A8 N4 C(A7 106.04(10) . . ? 
C(A8 N4 Fe1 126.83(9) . . ? 
C(A7 N4 Fe1 126.89(9) . . ? 
C(A3 C(M1 C(A2 123.59(12) . . ? 
C(A3 C(M1 C11 118.30(11) . . ? 
C(A2 C(M1 C11 118.12(11) . . ? 
C(A5 C(M2 C(A4 123.73(12) . . ? 
C(A5 C(M2 C21 118.39(12) . . ? 
C(A4 C(M2 C21 117.86(12) . . ? 
C(A7 C(M3 C(A6 123.91(12) . . ? 
C(A7 C(M3 C31 118.12(12) . . ? 
C(A6 C(M3 C31 117.96(12) . . ? 
C(A1 C(M4 C(A8 123.75(12) . . ? 
C(A1 C(M4 C41 117.84(12) . . ? 
C(A8 C(M4 C41 118.40(12) . . ? 
N1 C(A1 C(M4 125.98(12) . . ? 
N1 C(A1 C(B1 110.07(11) . . ? 
C(M4 C(A1 C(B1 123.93(12) . . ? 
N1 C(A2 C(M1 125.65(12) . . ? 
N1 C(A2 C(B2 110.14(11) . . ? 
C(M1 C(A2 C(B2 124.21(12) . . ? 
N2 C(A3 C(M1 125.99(11) . . ? 
N2 C(A3 C(B3 109.87(11) . . ? 
C(M1 C(A3 C(B3 124.15(12) . . ? 
N2 C(A4 C(M2 126.20(12) . . ? 
N2 C(A4 C(B4 110.08(12) . . ? 
C(M2 C(A4 C(B4 123.72(12) . . ? 
N3 C(A5 C(M2 125.69(12) . . ? 
N3 C(A5 C(B5 110.15(12) . . ? 
C(M2 C(A5 C(B5 124.15(12) . . ? 
N3 C(A6 C(M3 125.71(12) . . ? 
N3 C(A6 C(B6 110.18(12) . . ? 
C(M3 C(A6 C(B6 124.11(13) . . ? 
N4 C(A7 C(M3 126.14(12) . . ? 
N4 C(A7 C(B7 109.78(11) . . ? 
C(M3 C(A7 C(B7 124.07(12) . . ? 
N4 C(A8 C(M4 125.86(12) . . ? 
N4 C(A8 C(B8 110.11(12) . . ? 
C(M4 C(A8 C(B8 124.00(12) . . ? 
C(B2 C(B1 C(A1 106.94(12) . . ? 
C(B2 C(B1 H(B1 126.5 . . ? 
C(A1 C(B1 H(B1 126.5 . . ? 
C(B1 C(B2 C(A2 107.04(12) . . ? 
C(B1 C(B2 H(B2 126.5 . . ? 
C(A2 C(B2 H(B2 126.5 . . ? 
C(B4 C(B3 C(A3 107.10(12) . . ? 
C(B4 C(B3 H(B3 126.5 . . ? 
C(A3 C(B3 H(B3 126.5 . . ? 
C(B3 C(B4 C(A4 107.05(12) . . ? 
C(B3 C(B4 H(B4 126.5 . . ? 
C(A4 C(B4 H(B4 126.5 . . ? 
C(B6 C(B5 C(A5 106.87(13) . . ? 
C(B6 C(B5 H(B5 126.6 . . ? 
C(A5 C(B5 H(B5 126.6 . . ? 
C(B5 C(B6 C(A6 107.15(13) . . ? 
C(B5 C(B6 H(B6 126.4 . . ? 
C(A6 C(B6 H(B6 126.4 . . ? 
C(B8 C(B7 C(A7 107.11(12) . . ? 
C(B8 C(B7 H(B7 126.4 . . ? 
C(A7 C(B7 H(B7 126.4 . . ? 
C(B7 C(B8 C(A8 106.91(12) . . ? 
C(B7 C(B8 H(B8 126.5 . . ? 
C(A8 C(B8 H(B8 126.5 . . ? 
C16 C11 C12 118.48(12) . . ? 
C16 C11 C(M1 120.82(12) . . ? 
C12 C11 C(M1 120.70(12) . . ? 
C13 C12 C11 120.96(14) . . ? 
C13 C12 H12 119.5 . . ? 
C11 C12 H12 119.5 . . ? 
C14 C13 C12 118.20(14) . . ? 
C14 C13 H13 120.9 . . ? 
C12 C13 H13 120.9 . . ? 
F10 C14 C13 118.64(15) . . ? 
F10 C14 C15 118.53(15) . . ? 
C13 C14 C15 122.83(14) . . ? 
C14 C15 C16 118.38(14) . . ? 
C14 C15 H15 120.8 . . ? 
C16 C15 H15 120.8 . . ? 
C15 C16 C11 121.14(14) . . ? 
C15 C16 H16 119.4 . . ? 
C11 C16 H16 119.4 . . ? 
C22 C21 C26 118.93(15) . . ? 
C22 C21 C(M2 120.46(14) . . ? 
C26 C21 C(M2 120.60(15) . . ? 
C21 C22 C23 120.88(18) . . ? 
C21 C22 H22 119.6 . . ? 
C23 C22 H22 119.6 . . ? 
C24 C23 C22 118.05(19) . . ? 
C24 C23 H23 121.0 . . ? 
C22 C23 H23 121.0 . . ? 
C23 C24 F20 118.8(2) . . ? 
C23 C24 C25 123.29(16) . . ? 
F20 C24 C25 117.9(2) . . ? 
C24 C25 C26 118.33(19) . . ? 
C24 C25 H25 120.8 . . ? 
C26 C25 H25 120.8 . . ? 
C25 C26 C21 120.5(2) . . ? 
C25 C26 H26 119.7 . . ? 
C21 C26 H26 119.7 . . ? 
C36 C31 C32 118.53(13) . . ? 
C36 C31 C(M3 121.18(13) . . ? 
C32 C31 C(M3 120.29(13) . . ? 
C33 C32 C31 121.08(15) . . ? 
C33 C32 H32 119.5 . . ? 
C31 C32 H32 119.5 . . ? 
C34 C33 C32 118.14(15) . . ? 
C34 C33 H33 120.9 . . ? 
C32 C33 H33 120.9 . . ? 
F30 C34 C33 118.78(16) . . ? 
F30 C34 C35 118.26(16) . . ? 
C33 C34 C35 122.96(15) . . ? 
C34 C35 C36 118.27(15) . . ? 
C34 C35 H35 120.9 . . ? 
C36 C35 H35 120.9 . . ? 
C31 C36 C35 121.01(14) . . ? 
C31 C36 H36 119.5 . . ? 
C35 C36 H36 119.5 . . ? 
C42 C41 C46 118.40(14) . . ? 
C42 C41 C(M4 121.63(14) . . ? 
C46 C41 C(M4 119.97(13) . . ? 
C41 C42 C43 120.87(18) . . ? 
C41 C42 H42 119.6 . . ? 
C43 C42 H42 119.6 . . ? 
C44 C43 C42 118.61(18) . . ? 
C44 C43 H43 120.7 . . ? 
C42 C43 H43 120.7 . . ? 
C43 C44 F40 118.61(18) . . ? 
C43 C44 C45 123.24(15) . . ? 
F40 C44 C45 118.15(18) . . ? 
C44 C45 C46 117.76(17) . . ? 
C44 C45 H45 121.1 . . ? 
C46 C45 H45 121.1 . . ? 
C41 C46 C45 121.11(16) . . ? 
C41 C46 H46 119.4 . . ? 
C45 C46 H46 119.4 . . ? 
O1 N5 O1A 100.8(9) . . ? 
O1 N5 Fe1 138.95(12) . . ? 
O1A N5 Fe1 120.2(9) . . ? 
C1 N6 C3 104.99(13) . . ? 
C1 N6 Fe1 128.00(10) . . ? 
C3 N6 Fe1 126.85(10) . . ? 
C1 N7 C2 107.08(13) . . ? 
C1 N7 C4 127.57(15) . . ? 
C2 N7 C4 125.34(16) . . ? 
N6 C1 N7 111.69(13) . . ? 
N6 C1 H1A 124.2 . . ? 
N7 C1 H1A 124.2 . . ? 
C3 C2 N7 106.31(15) . . ? 
C3 C2 H2A 126.8 . . ? 
N7 C2 H2A 126.8 . . ? 
C2 C3 N6 109.93(14) . . ? 
C2 C3 H3A 125.0 . . ? 
N6 C3 H3A 125.0 . . ? 
N7 C4 H4A 109.5 . . ? 
N7 C4 H4B 109.5 . . ? 
H4A C4 H4B 109.5 . . ? 
N7 C4 H4C 109.5 . . ? 
H4A C4 H4C 109.5 . . ? 
H4B C4 H4C 109.5 . . ? 
 
_diffrn_measured_fraction_theta_max     .993 
_diffrn_reflns_theta_full              31.00 
_diffrn_measured_fraction_theta_full    .993 
_refine_diff_density_max     .432 
_refine_diff_density_min    -.281 
_refine_diff_density_rms     .054 
